# Supplementary material
Source: PubMed Central journal article supplement (PMC4104052)
Supplement: mmc4.pdf [file mmc4.pdf]

## Article

## Quantitative Analysis of the Lamellarity of Giant Liposomes Prepared by the Inverted Emulsion Method

Masataka Chiba,<sup>1</sup> Makito Miyazaki,<sup>1</sup> and Shin'ichi Ishiwata<sup>1,2,\*</sup><sup>1</sup>Department of Physics, Faculty of Science and Engineering, Waseda University, Tokyo, Japan; and <sup>2</sup>Waseda Bioscience Research Institute in Singapore (WABIOS), Singapore, Singapore

**ABSTRACT** The inverted emulsion method is used to prepare giant liposomes by pushing water-in-oil droplets through the oil/water interface into an aqueous medium. Due to the high encapsulation efficiency of proteins under physiological conditions and the simplicity of the protocol, it has been widely used to prepare various cell models. However, the lamellarity of liposomes prepared by this method has not been evaluated quantitatively. Here, we prepared liposomes that were partially stained with a fluorescent dye, and analyzed their fluorescence intensity under an epifluorescence microscope. The fluorescence intensities of the membranes of individual liposomes were plotted against their diameter. The plots showed discrete distributions, which were classified into several groups. The group with the lowest fluorescence intensity was determined to be unilamellar by monitoring the exchangeability of the inner and the outer solutions of the liposomes in the presence of the pore-forming toxin  $\alpha$ -hemolysin. Increasing the lipid concentration dissolved in oil increased the number of liposomes ~100 times. However, almost all the liposomes were unilamellar even at saturating lipid concentrations. We also investigated the effects of lipid composition and liposome content, such as highly concentrated actin filaments and *Xenopus* egg extracts, on the lamellarity of the liposomes. Remarkably, over 90% of the liposomes were unilamellar under all conditions examined. We conclude that the inverted emulsion method can be used to efficiently prepare giant unilamellar liposomes and is useful for designing cell models.

### INTRODUCTION

A liposome is a vesicle surrounded by a lipid bilayer, in which lipid molecules face their hydrophobic parts (tail regions) toward the interior of the bilayer and expose their hydrophilic parts (head regions) toward the surrounding aqueous medium (1). Because a lipid bilayer is the basic structure of the cell membrane (1), micrometer-sized giant liposomes serve as useful cell models (2–23).

Various methods have been proposed to prepare giant liposomes (24). The hydration method, which is also called the swelling method, is one of the most popular methods for vesicle preparation. In this method, lipids dissolved in organic solvent are spread on a substrate. As the solvent evaporates, a multilayered lipid bilayer film is formed. The dry lipid film is then filled with buffer solution. The lipid layers spontaneously peel from the film, enclose the solution, and transform into liposomes. This method is simple; thus, it is widely used (3,5–7). However, the efficiency of vesicle formation is sensitive to lipid composition and the hydration buffer. In particular, encapsulation of highly concentrated proteins under physiological buffer conditions is difficult (24), a feature that is crucial for the construction of cell models. Moreover, the lamellarity, which is defined as the number of bilayers surrounding the liposome, varies

among these liposomes, resulting in contamination of the preparation by numerous multilamellar vesicles (24,25). Because cell membranes are unilamellar, this hydration method is not suited for developing cell models.

The electroformation method, in which an AC electric field is applied across a lipid film and the surrounding medium during the hydration process, is also extensively used (8–11); however, this method has the same limitations as the hydration method (24). The electric field applied during the vesicle formation process might also alter the activity of the enclosed enzymes (24). Although several improvements for these two methods have been reported (26–30), to our knowledge, their limitations in lipid composition, low encapsulation efficiency of highly concentrated proteins under physiological buffer conditions, and contamination with multilamellar liposomes have not been simultaneously solved. To overcome these problems, new methods such as the pulsed jetting (31–34) and transient membrane ejection (35) methods were proposed. However, these methods require expertise in microfluidics.

In contrast, the inverted emulsion method (36), which is also called the transfer method, involves spontaneous transformation of water-in-oil droplets into liposomes by passage through the water/oil interface (Fig. 1 A). This method enables encapsulation of cell extracts (15,21) or highly concentrated proteins (at close to intracellular concentrations) (19) into giant liposomes under various buffer conditions and lipid compositions in a simple and a unified way. In addition,

Submitted April 29, 2014, and accepted for publication May 29, 2014.

\*Correspondence: [ishiwata@waseda.jp](mailto:ishiwata@waseda.jp)

Masataka Chiba and Makito Miyazaki contributed equally to this work.

Editor: Hagan Bayley.

© 2014 by the Biophysical Society  
0006-3495/14/07/0346/9 \$2.00

<http://dx.doi.org/10.1016/j.bpj.2014.05.039>

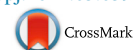

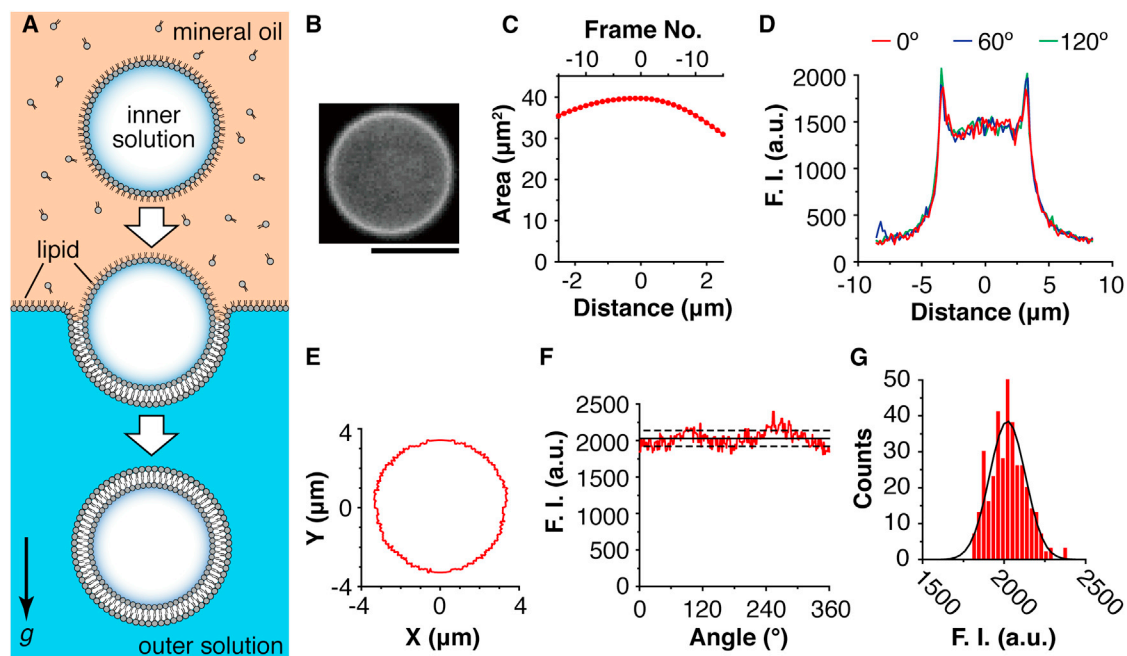

FIGURE 1 Measurement of the fluorescence intensity of individual liposomes prepared by the inverted emulsion method. (A) A schematic illustration of the inverted emulsion method. Water-in-oil droplets were transformed into liposomes by passage through the oil/water interface by centrifugation. (B) Epifluorescence image of a liposome across the equatorial plane. Scale bar: 5  $\mu\text{m}$ . Data shown in (C–G) were obtained from this liposome. (C) Relationship between the cross-sectional areas of the liposome and the frame number scanned on the Z axis. The frame that had the maximum area was determined to be the equatorial plane, and is shown as frame number 0. (D) Fluorescence intensity (F.I.) profiles of a cross section of the liposome. The position at 0  $\mu\text{m}$  indicates the center of mass. Measurements were performed radially from the center of the mass, every one degree. The intensity profiles at 0°, 60°, and 120° were shown as the examples. (E–G) The membrane fluorescence intensity profile of the liposome, obtained from (D). (E) The peak fluorescence intensity positions in the X-Y plane. The position at (0,0) indicates the center of mass. (F) The peak fluorescence intensity profile against the angle of the radial axis. The average value (black solid line) and the SD (black dashed line) are also shown. (G) Histogram of the membrane fluorescence intensities shown in (F) and the Gaussian fit (black solid line).

membrane proteins are successfully reconstituted without loss of biochemical function (15,20,37). Because of the step-wise process of vesicle formation, the lipid composition of the inner and outer leaflets of the liposomes can be controlled independently (38–40). The orientation of a membrane protein can also be controlled (37). Due to the high encapsulation efficiency under physiological conditions and the simplicity of the protocol, the inverted emulsion method has been extensively used to prepare various cell models, including a self-replication model of protocells (14), model cells containing protein expression systems (15), and cytoskeletal networks such as an actin cortex (16,17), actomyosin gel (19,20), microtubule asters (21), and bacterial cytoskeletal filaments (22,23). Although it is assumed that the inverted emulsion method can be used to prepare unilamellar liposomes with high efficiency, and despite its broad use, the lamellarity of liposomes prepared by this method has not been investigated quantitatively.

Here, we established a method to determine the lamellarity of individual liposomes under an optical microscope, and report the results of a quantitative analysis of liposomes prepared by the inverted emulsion method. The analysis method, which is rather simple, is based on a previous study by Akashi et al. (25). By analyzing the fluorescence intensity of the liposomal membranes, and by fitting a theoretical

curve to the experimental data, the lamellarity of individual liposomes was quantitatively determined. We confirmed that the lamellarity was nearly independent of the lipid concentration dissolved in oil, lipid composition, and vesicle contents. Indeed, >90% of the liposomes were unilamellar under all preparation conditions tested.

## MATERIALS AND METHODS

### Buffers

A50 buffer (50 mM HEPES-KOH pH 7.6, 50 mM KCl, 5 mM MgCl<sub>2</sub>, 1 mM EGTA) was used for all experiments except the actin polymerization assay. In the actin polymerization assay, G buffer (2 mM Tris-HCl pH 8.0, 0.05 mM CaCl<sub>2</sub>, 2 mM NaN<sub>3</sub>, 0.1 mM ATP, 0.5 mM 2-mercaptoethanol) was used to encapsulate G-actin in liposomes. For the inner solution of the liposomes, 150 mM sucrose and 350 mM glucose were added, and for the outer solution, 500 mM glucose was added so that the osmolality on each side of the membrane would be equivalent. To encapsulate *Xenopus* egg extracts, XB buffer (10 mM HEPES-KOH pH 7.7, 100 mM KCl, 1 mM MgCl<sub>2</sub>, 0.1 mM CaCl<sub>2</sub>, 50 mM sucrose) was used for the outer solution.

### Proteins and lipids

Actin was purified from rabbit skeletal muscle (41), and labeled with Alexa Fluor 488 C<sub>5</sub>-maleimide (A-10254; Molecular Probes, Eugene, OR). Tetramethylrhodamine-bovine serum albumin (TMR-BSA) was prepared by

labeling BSA (A3059; Sigma-Aldrich, St. Louis, MO) with tetramethylrhodamine-5-maleimide (T-6027; Molecular Probes).  $\alpha$ -Hemolysin from *Staphylococcus aureus* was purchased from Toxin Technology (HT101; Sarasota, FL), dissolved in A50 buffer at a concentration of 5 mg/mL, snap frozen in liquid nitrogen, and stored at  $-84^{\circ}\text{C}$ . *Xenopus laevis* egg extracts were prepared as described previously (42). L- $\alpha$ -phosphatidylcholine from chicken egg yolk (egg PC), 1,2-dioleoyl-*sn*-glycero-3-phosphoethanolamine (DOPE), 1,2-dioleoyl-*sn*-glycero-3-phosphatidylglycerol (DOPG), and 1,2-dioleoyl-*sn*-glycero-3-phosphoethanolamine-N lissamine rhodamine B sulfonyle ammonium salt (rhodamine PE) were purchased from Avanti Polar Lipids (Alabaster, AL). Oregon Green 488 1,2-dihexadecanoyl-*sn*-glycero-3-phosphoethanolamine (Oregon Green PE) was purchased from Invitrogen (Carlsbad, CA). Cholesterol was purchased from Wako (Osaka, Japan).

## Liposome preparation

Giant liposomes were prepared according to the method of Noireaux and Libchaber (15) with slight modifications. Lipids were first dissolved in chloroform (034-02603; Wako), which was dehydrated with molecular sieves 4A, and put into 1.5 mL glass test tubes. These test tubes were placed inside a vacuum desiccator and evacuated overnight to remove chloroform from the lipids completely. The lipid dry film was stored in a vacuum desiccator at room temperature under dark conditions and used within 2 weeks. The lipid dry film was mixed with 1 mL of mineral oil (23306-84; Nacalai Tesque, Kyoto, Japan), heated to  $80^{\circ}\text{C}$  and dissolved in the oil by vortexing. Heating and vortexing processes were repeated several times until the film disappeared completely. Next, the lipid-oil mixture was sonicated for 90 min in a bath sonicator at  $60^{\circ}\text{C}$  and a power of 60 W (AS12GTU; As One, Osaka, Japan). Immediately after the sonication, the lipid-oil mixture was vortexed, cooled to room temperature, and kept overnight under dark conditions to disperse lipid molecules completely. This lipid-oil mixture was stored at room temperature under dark conditions and used within 2 days.

Just before use, 200  $\mu\text{L}$  of lipid-oil mixture was put into 1.5 mL sample tube and cooled on ice for  $>15$  min. Next, 20  $\mu\text{L}$  of inner-solution was added to the lipid-oil mixture and immediately emulsified by vortexing (power max; Vortex-Genie 2; Scientific Industries, Bohemia, NY) for 30 s. The sample tube was incubated on ice for 5 min to stabilize the emulsion by spontaneous alignment of lipid molecules at the inner-buffer/oil interface. Subsequently, 150  $\mu\text{L}$  of the emulsion was gently placed on 1 mL of outer-solution in a 1.5 mL glass test tube and incubated on ice for 5 min to allow for the assembly of lipid monolayer at the oil/outer-solution interface. Finally, the glass test tube was centrifuged ( $12,000 \times g$ , 30 min,  $4^{\circ}\text{C}$ ) to push the emulsion droplets through the interface. After centrifugation, the oil layer and 500  $\mu\text{L}$  of buffer solution were gently drawn off from the top of the tube by using a suction aspirator. Finally, 500  $\mu\text{L}$  of liposome solution remained at the bottom. For the encapsulation of *Xenopus* egg extracts, 10  $\mu\text{L}$  of the extracts were mixed with 200  $\mu\text{L}$  of lipid-oil mixture by gentle vortexing (power minimum; Vortex-Genie 2; Scientific Industries) for 10 s to prepare extracts-in-oil droplets. After 5 min incubation on ice, 150  $\mu\text{L}$  of this emulsion was placed on 1 mL of XB buffer and incubated 5 min on ice. The sample was then gently centrifuged ( $100 \times g$ , 15 min,  $4^{\circ}\text{C}$ ) to transform droplets into liposomes.

## Microscopy

Epifluorescence and bright-field images of liposomes were acquired with a custom-built inverted microscope equipped with a  $\times 100$  objective (PlanApo NA 1.40 oil; Olympus, Tokyo, Japan), an electron multiplying charge coupled device (EM-CCD) camera (iXon3 DU-897E-CS0-#BV; Andor Technology, Belfast, UK), a 100 W mercury lamp for the epifluorescence light source (U-ULS100HG; Olympus), and a custom-built XYZ motorized sample stage driven by stepping motors (SGSP-13ACT-BO;

Sigma-Koki, Tokyo, Japan). The entire microscopy system was controlled by LabVIEW (National Instruments, Austin, TX).

## Observation, image acquisition, and analysis

A flow chamber was assembled by placing two double-sided tapes (thickness 0.3 mm; PBW-20; 3M, Maplewood, MN) onto a silicone-coated coverslip ( $36 \times 24 \text{ mm}^2$ , custom-ordered; Matsunami, Osaka, Japan) with another coverslip ( $18 \times 18 \text{ mm}^2$ ; Matsunami) on top. The inner distance between the two tapes was  $\sim 8$  mm, and the inner volume of the chamber was  $\sim 40 \mu\text{L}$ . First, the flow chamber was coated with 60  $\mu\text{L}$  of Pluronic-F127 (10 mg/ml dissolved in A50 buffer) for  $>1$  min to prohibit nonspecific adsorption of liposomes. The flow chamber was then washed with 600  $\mu\text{L}$  of the outer solution of liposomes. Just before use, liposome solution was mixed gently by pipetting to disperse liposomes homogeneously and 150  $\mu\text{L}$  was perfused into the flow chamber. The flow chamber was sealed with Valap and kept horizontal for  $>30$  min to settle down liposomes on the bottom coverslip. Liposomes that exhibited circular periphery and with the diameter larger than  $2 \mu\text{m}$  were selected, and the whole fluorescence image of the liposomes was scanned from bottom to top at a constant speed of  $5 \mu\text{m/s}$ , at 25 fps, and at  $25 \pm 1^{\circ}\text{C}$ . The lamellarities of individual liposomes were analyzed with LabVIEW (National Instruments).

## Actin polymerization assay

Liposomes containing 10  $\mu\text{M}$  monomeric actin (10% Alexa Fluor 488-labeled), 10% (w/v) polyethylene glycol (20 k), 150 mM sucrose, and 350 mM glucose in G buffer were prepared. For the outer solution, 500 mM glucose in G buffer was used. The following was added to the outer solution: 7/20 volume of 142.9 mM HEPES-KOH pH 7.6, 142.9 mM KCl, 14.3 mM  $\text{MgCl}_2$ , 2.9 mM EGTA, and 500 mM glucose containing 0.7 mg/mL  $\alpha$ -hemolysin. The external medium contained final concentrations of 50 mM HEPES-KOH pH 7.6, 50 mM KCl, 5 mM  $\text{MgCl}_2$ , 1 mM EGTA, 500 mM glucose, and 0.25 mg/mL  $\alpha$ -hemolysin. This mixture was immediately perfused into a flow chamber, sealed with Valap to prevent flow, and then image acquisition was started.

## Liposome counting

To count the number of liposomes, an inverted microscope (DIAPHOT 300; Nikon, Tokyo, Japan) equipped with  $\times 60$  objective (PlanApo NA 1.40 oil Ph4), CCD camera (CCD-300-RCX; Dage-MTI, Michigan, IN) and custom-built XYZ motorized sample stages driven by stepping motors (SGSP20-20 and SGSP60-10ZF; Sigma-Koki) was used. Phase-contrast images of liposomes were automatically scanned along the Z axis from  $-25$  to  $100 \mu\text{m}$  ( $0 \mu\text{m}$  corresponds to the position of the bottom coverslip) at the constant speed of  $20 \mu\text{m/s}$ , 30 fps, 50 different fields of view, and at  $24 \pm 2^{\circ}\text{C}$ . Clear spherical liposomes with the diameter larger than  $2 \mu\text{m}$  were then automatically detected and the number was counted by LabVIEW (National Instruments).

## RESULTS

### Lamellarity analysis of individual liposomes by epifluorescence microscopy

Giant liposomes were prepared by the inverted emulsion method (Fig. 1 A). For the phospholipids, we chose natural PC purified from chicken egg yolk, because PC is a major plasma membrane component (43); thus, egg PC is one of the phospholipids most commonly used to build cell models (7,10,12,16–21). For the encapsulating solution and external

medium, we used biologically relevant buffers (see [Materials and Methods](#)). To measure the lamellarity of the liposomes, 0.1% (mol/mol) rhodamine PE was added to the egg PC.

Observations were performed under an epifluorescence microscope. Most of the liposomes exhibited a spherical shape ([Fig. 1 B](#)). The encapsulated solution had slightly higher densities than the external solution. Therefore, most of the liposomes settled down on the bottom coverslip within 30 min. After waiting for longer than 30 min, a spherical liposome on the bottom coverslip was scanned along the *Z* axis from the bottom to the top with a 0.2  $\mu\text{m}$  interval per frame. As a result, an image of an entire liposome was obtained in every 0.2  $\mu\text{m}$  slice.

We next analyzed the images. First, the background camera noise was subtracted from the cross-sectional images. Next, the unevenness of the illumination was corrected by taking an image of the homogeneous fluorescent solution (0.1  $\mu\text{M}$  rhodamine B) and dividing the liposome image by this image. Cross-sectional areas of the liposome were then calculated in every frame ([Fig. 1 C](#)), and the frame that had the maximum area was selected for further analysis. In the selected frame ([Fig. 1 B](#)), the center of mass in the liposome was determined. The lines were drawn radially from the center of mass every one degree. The fluorescence intensity profiles were measured along these lines ([Fig. 1 D](#)), and the peak intensity value and its *XY* position were obtained for

every angle ([Fig. 1, E and F](#)). If there were no lipid aggregates on the membrane and inside the liposome, the fluorescence intensity along the circumference of the liposome was almost homogeneous ([Fig. 1 F](#)), and this histogram was fitted well by a Gaussian function ([Fig. 1 G](#)). In contrast, if lipid aggregates were attached to the membrane ([Fig. S1 A](#) in the [Supporting Material](#)) or inside the liposome, the fluorescence intensity profile along the circumference of the liposome had a sharp peak(s) ([Fig. S1 B](#)). Such liposomes were not used in the lamellarity analysis described below.

We analyzed >100 liposomes in the same observation chamber, and the mean fluorescence intensities of individual liposomes along the circumference were plotted against their diameter. The plots showed discrete distributions and appeared to be classified into several groups ([Fig. 2 A](#). See also [Fig. S5 D](#), which had more data points in the higher fluorescence intensity groups).

The group that had the lowest fluorescence intensity was expected to be unilamellar. In the plots in this group, the intensity monotonically tended to increase with increasing vesicle diameter, which apparently plateaued at large diameters. This diameter dependency can be explained by the geometry of the observation setup ([Fig. 2 B](#)). Because we used an epifluorescence microscope, the focal depth was deep, and it was expected to be on the order of submicrons to several microns. Therefore, the contribution of the

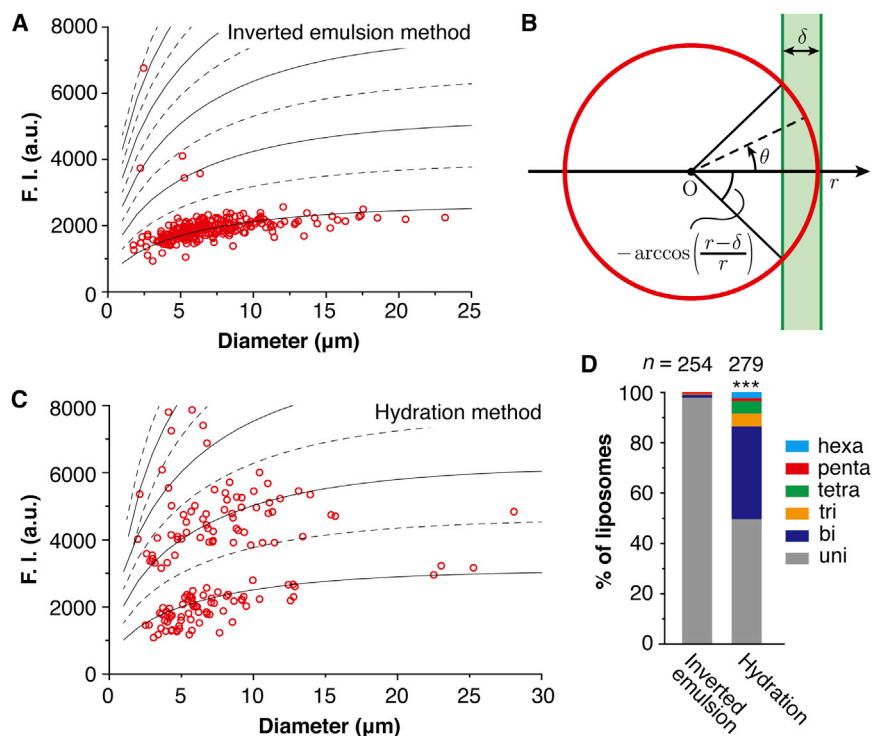

**FIGURE 2** Lamellarity analysis and a comparison of the lamellarity of liposomes prepared by the inverted emulsion and hydration methods. (A) The membrane fluorescence intensities of individual liposomes prepared by the inverted emulsion method were plotted against their diameter. The lowest black solid line indicates the theoretical curve  $I(r)$  fitted to the lowest fluorescence intensity group of the plots. The upper four black solid lines are two-, three-, four-, and fivefold larger than the  $I(r)$ . The black dashed lines are 1.5-, 2.5-, 3.5-, 4.5-, and 5.5-fold larger than the  $I(r)$ . We determined that the liposomes with intensities that are under the lowest dashed line were unilamellar, whereas the liposomes that are between the lowest and second lowest dashed lines were bilamellar, and so on. Egg PC (1 mM) containing 0.1% (mol/mol) rhodamine PE dissolved in oil was used to prepare the liposomes. (B) A schematic illustration of the side view of a liposome under an epifluorescence microscope. The red circle represents the membrane of the liposome with radius  $r$ . The horizontal axis represents the focal plane. O: center of mass.  $\delta$ : pixel size of the image. The fluorescence signal of the membrane out of the focal plane, illustrated as the green area, may contribute to the apparent fluorescence intensity measured in the focal plane. (C) Plots of the membrane fluorescence intensities of individual liposomes prepared by the hydration method. Egg PC

containing 0.1% (mol/mol) rhodamine PE was used to prepare the liposomes. (D) Lamellarity distributions of the liposomes prepared by the inverted emulsion and hydration methods. Several independent experiments were performed and the total counts were plotted. The proportion of unilamellar liposomes prepared by the two methods were compared to each other with the  $\chi^2$  test and Fisher's exact test. \*\*\* $p < 0.001$ .

fluorescence signal from out of the focal plane had to be considered. If we assume that the magnitude of fluorescence contribution from out of the focal plane can be approximated by a Gaussian function  $\exp(-z^2/2\sigma^2)$ , where  $z$  is the distance from the focal plane and  $\sigma$  is the width of the distribution corresponding to the focal depth, the apparent fluorescence intensity of the unilamellar membrane at the equatorial plane can be expressed as

$$I(r) = I_0 \int_{-\arccos\left(\frac{r-\delta}{r}\right)}^{+\arccos\left(\frac{r-\delta}{r}\right)} \exp\left(-\frac{r^2 \sin^2 \theta}{2\sigma^2}\right) r d\theta,$$

where  $r$  is the radius of the liposome,  $I_0$  is the fluorescence intensity of the unilamellar membrane per unit surface area, and  $\delta$  is the pixel size of the observed images.

We fitted  $I(r)$  to the lowest fluorescence intensity group via  $I_0$  and  $\sigma$ . The pixel size,  $\delta$ , was fixed at  $0.143 \mu\text{m}$ , which was measured with an objective micrometer. As a result,  $I(r)$  fitted well to the experimental data (Fig. 2 A, the *bottommost black solid line*). From the fitting, we obtained a reasonable value for the depth of fluorescence leakage:  $\sigma = 0.913 \mu\text{m}$ . The values for  $\delta$  and  $\sigma$  should be dependent on the microscopy system, but independent of the sample to be measured. Therefore, we used the same values for all the experiments described below.

We next drew lines that were two-, three-, four-, and five-fold larger than  $I(r)$  (Fig. 2 A, the *upper four black solid lines*). Those lines overlapped with some of the data points that were separated from the lowest fluorescence intensity group, implying that those liposomes were multilamellar. To quantify the lamellarity distribution, we adopted the 1.5-, 2.5-, 3.5-, 4.5-, and 5.5-fold  $I(r)$  lines as the criteria (*black dashed lines* in Fig. 2 A), and defined the data points below the 1.5-fold line as unilamellar, those between the 1.5- and 2.5-fold lines as bilamellar, those between the 2.5- and 3.5-fold lines as trilamellar, and so on. Indeed, 98.0% of the liposomes were determined to be unilamellar (Fig. 2 D, Table S1).

We confirmed that the amount of rhodamine PE added with the egg PC hardly affected lamellarity (Fig. S2 B, Table S1). Additionally, replacement of rhodamine PE with Oregon Green PE did not significantly change the lamellarity (Fig. S2, A and B; Table S1). These results suggested that our lamellarity analysis method is robust against the type and amount of fluorescently labeled phospholipid used.

### Confirmation of unilamellarity by $\alpha$ -hemolysin treatment

To confirm that the liposomes in the lowest fluorescence intensity group were unilamellar, the exchangeability of solutions through the liposomal membrane was examined by

using the pore-forming toxin  $\alpha$ -hemolysin (15). The pore size of  $\alpha$ -hemolysin is  $\sim 2.8 \text{ nm}$ ; therefore, small molecules such as ions can pass through the pore but proteins cannot (44). The stem domain of  $\alpha$ -hemolysin that forms the transmembrane pore is  $\sim 5.2 \text{ nm}$  in length (44), which is approximately equal to the thickness of the lipid bilayer (45). Therefore,  $\alpha$ -hemolysin can only make a pore in a unilamellar membrane, i.e., buffer exchange will be observed in unilamellar liposomes but not in multilamellar liposomes.

Exchangeability of solutions was determined by monitoring the actin polymerization reaction inside the liposomes. We prepared liposomes in which actin monomers were encapsulated, and then a high salt buffer containing  $\alpha$ -hemolysin was added to the external medium. The osmotic pressure of this buffer was balanced with the inner solution of the liposomes. If the liposome is unilamellar,  $\alpha$ -hemolysin will penetrate the membrane and make a transmembrane pore, inducing buffer exchange between the inside and outside of the liposome. The increase in the salt concentration inside the liposomes will initiate actin polymerization. To easily identify the polymerized actin filaments, polyethylene glycol (PEG) was also encapsulated inside the liposomes to induce actin filament bundling by depletion force (46).

Time-lapse microscopy showed that actin bundles began to appear an average of 30 min after the addition of  $\alpha$ -hemolysin (Fig. 3 A; Movie S1), and the bundle formation was terminated  $\sim 60 \text{ min}$  after  $\alpha$ -hemolysin was added (Fig. 3 B). After 120 min, the fluorescence intensities of the membranes of individual liposomes were measured, and a percentage of liposomes containing actin bundles in the lowest intensity group was compared to that in the higher intensity group (Fig. 3 C). In the lowest intensity group, 94.3% of liposomes contained actin bundles. In contrast, only 8.7% of liposomes in the higher intensity group contained actin bundles. We also confirmed that the addition of actin polymerization buffer without  $\alpha$ -hemolysin to the liposomes did not induce actin bundle formation in both groups. These results indicate that buffer exchange after  $\alpha$ -hemolysin treatment occurred in most liposomes in the lowest intensity group, but rarely occurred in the liposomes in the higher intensity group. It is worth noting that the percentage of liposomes that exchanged the solution could be higher than the percentage in which actin bundles were observed, because there is a possibility that the polymerized actin did not form visible bundles in some liposomes. Therefore, we conclude that the liposomes with the lowest fluorescence intensity were unilamellar, and thus over 90% of the liposomes prepared by the inverted emulsion method were unilamellar.

We found that actin bundles were formed in several multilamellar liposomes, presumably because these liposomes had portions that were unilamellar (Fig. S3), and  $\alpha$ -hemolysin made pores in these portions. In addition, we tried to confirm the lamellarity by using the resonance transfer

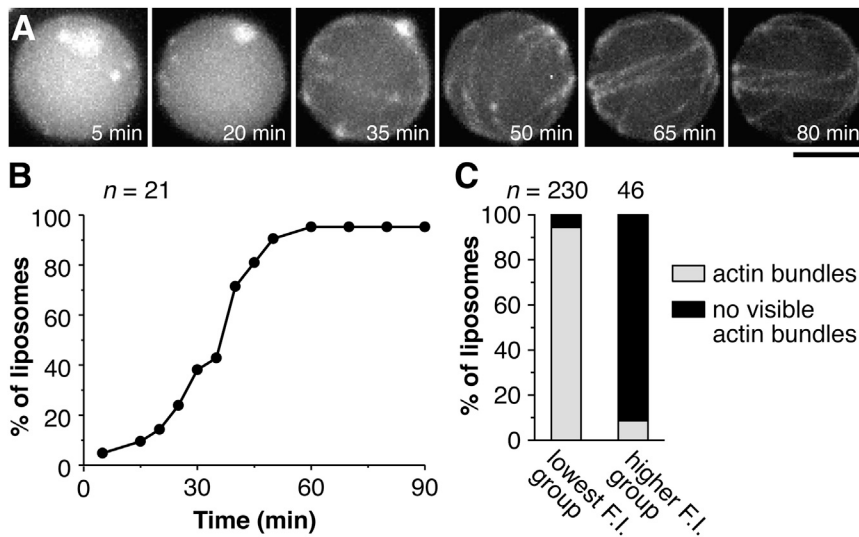

**FIGURE 3** Actin polymerization inside liposomes induced by  $\alpha$ -hemolysin treatment. (A) Time-lapse image series of the actin-encapsulated liposome, showing spontaneous polymerization and bundling of actin filaments.  $\alpha$ -Hemolysin was added at 0 min. Actin was partially labeled with Alexa Fluor 488. Egg PC containing 0.1% (mol/mol) rhodamine PE was used to prepare the liposomes. Scale bar: 5  $\mu$ m. (B) The percentage of liposomes in which actin bundles were assembled over time. (C) The percentages of actin bundle-assembled liposomes in the lowest and higher intensity groups were compared. We performed several independent experiments, and the total counts were plotted. We looked through many flow chambers to obtain a sufficient number of liposomes in the higher intensity group.

quencher QSY7, because it was reported that this quencher only quenched the fluorescence of the outer leaflet of a membrane exposed to solution containing the quencher (40). However, this quencher did not work as expected under our experimental conditions (Fig. S4).

### Comparing the lamellarity of liposomes prepared by the inverted emulsion and hydration methods

We compared the lamellarity of liposomes prepared by the hydration method to that of those prepared by the inverted emulsion method. Although the plots of the fluorescence intensities of liposomes prepared by the hydration method showed a discrete distribution (Fig. 2 C), similar to those prepared by the inverted emulsion method (Fig. 2 A), the hydration method plots had many data points in the range of the higher intensity groups, indicating that there were many multilamellar liposomes. We quantified the lamellarity of these liposomes in the same way as the inverted emulsion method. The percentage of unilamellar liposomes prepared by the inverted emulsion and hydration methods were 98.0% and 49.8%, respectively, showing a significant difference (Fig. 2 D, Table S1).

### High lipid concentrations promoted liposome formation but did not alter lamellarity

The effects of the concentration of lipid dissolved in oil were examined. On increasing the lipid concentration from 0.1 to 10 mM, the number of liposomes increased  $\sim$ 100 times, and apparently saturated at 5 mM (Fig. 4 A). However, 92.1% of liposomes remained unilamellar even at 10 mM (Fig. 4 B; Fig. S5, A–D; Table S1). The size distribution of the liposomes was not significantly changed by differences in lipid concentration (Fig. S5 E). We conclude that it is easy to increase the liposome production efficiency when

using the inverted emulsion method by increasing the lipid concentration without changing lamellarity or vesicle size.

### Lamellarity was independent of lipid composition and vesicle contents

We replaced a portion of the egg PC with DOPE, DOPG, or cholesterol, and performed the lamellarity analysis experiments. Phosphatidylethanolamine (PE) has a smaller head than phosphatidylcholine (PC). Therefore, it stabilizes the negative curvature of lipid bilayers and localizes at the outer leaflet of cleavage furrows in animal cells (47). Phosphatidylglycerol (PG) has a negative charge on its head, and it

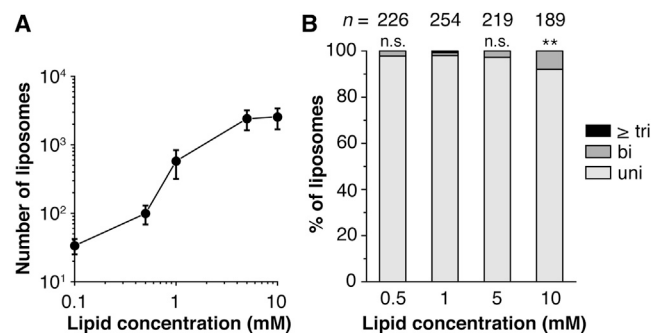

**FIGURE 4** Effect of the lipid concentration dissolved in mineral oil on liposome lamellarity. In all experiments, egg PC containing 0.1% (mol/mol) rhodamine PE was used. (A) Average number of liposomes found in the observation chamber per 50 fields of view ( $0.031 \text{ mm}^2 \times 50 = 1.55 \text{ mm}^2$ ) was plotted against the lipid concentration dissolved in oil. Clear spherical-shaped liposomes with a diameter larger than 2  $\mu$ m were counted. We performed at least three independent experiments, and averaged these results for each lipid concentration. Error bars indicate the SD. (B) Lamellarity distributions of the liposomes prepared at different lipid concentrations. The percentages of unilamellar liposomes in preparations containing 0.5, 5, and 10 mM lipid were compared with that prepared with 1 mM egg PC by the  $\chi^2$  test and Fisher's exact test. n.s.: not significant ( $p > 0.05$ ),  $**p < 0.01$ .

binds cations (48). Cholesterol changes the fluidity of the membrane by intercalating into the phospholipids (49). Because these lipids change the physical properties of lipid bilayers in membranes, we expected that they might affect the lamellarity of liposomes. However, over 95% of the liposomes were unilamellar under all conditions examined, and there were no significant differences among them (Fig. 5; Fig. S6; Table S1), suggesting that lamellarity was independent of lipid composition.

To develop cell models, it is important to investigate whether lamellarity is independent of vesicle content. Here, we encapsulated highly concentrated proteins, specifically, 50  $\mu\text{M}$  F-actin or 25 mg/mL BSA inside liposomes made of egg PC, and determined their lamellarity. Indeed, >98% of these liposomes were unilamellar (Fig. 6, A and B; Table S1), implying that the shape (globular or filamentous) and type of encapsulating protein did not affect lamellarity. Moreover, even when *Xenopus* egg extracts were encapsulated, 96.3% of the liposomes remained unilamellar (Fig. 6 C; Table S1).

## DISCUSSION

We showed that the inverted emulsion method generated giant unilamellar liposomes in remarkably high efficiency. One weak aspect of this method is the possibility of oil contamination inside the lipid bilayer (24). Although it has been reported that such contamination was less than the detection limit (36), the level of contamination depends on the type of oil used and the vesicle formation protocol. Therefore, further investigation is required to quantify this possibility. Recently, it was reported that the dynamic response of the membrane of liposomes prepared by the inverted emulsion method differed from that of liposomes prepared by the electroformation method, which might be due to low levels of oil contamination inside the lipid bilayer.

However, interestingly, the viscoelastic properties of liposomes prepared by the inverted emulsion method were more similar to those of cellular membrane than that of liposomes prepared by the electroformation method (50). In this sense, the inverted emulsion method is well suited to modeling the physical properties of cell membranes.

Our findings showed that a small fraction of the liposomes prepared by the inverted emulsion method will be multilamellar liposomes. The assembly mechanisms of these liposomes remain unknown. Although several possible mechanisms can be proposed (Fig. S7), direct observation of the liposome formation process will be useful for clarifying these mechanisms (51–53). Furthermore, it is important to reduce the multilamellar liposome contamination to infinitesimally low levels.

Contamination with even a small number of multilamellar liposomes indicates that, in some cases, one has to measure the lamellarity of all liposomes to be used to validate the experimental results. If the proportion of fluorescently labeled lipids dissolved in oil is fixed constant, in principle, the fluorescence intensity of the unilamellar membrane per unit surface area  $I_0$  should be unique among different samples. Thus, the lamellarity of a single liposome could be determined from  $I(r)$  without analyzing several tens of liposomes in the same observation chamber and fitting  $I(r)$  via  $I_0$  to the plots every time, as we demonstrated here. However, it was experimentally difficult to obtain exactly the same  $I_0$  due to handling error in the preparation of lipid-oil mixtures. To overcome this problem, we confirmed that the bulk fluorescence intensity of the lipid-oil mixture  $I_b$ , which was measured by a fluorescence spectrophotometer, and the fitting parameter  $I_0$  were linearly correlated when the fluorescent lipid concentration was sufficiently low (Fig. S8). Therefore, if  $I_b$  has been measured in advance, the lamellarity of individual liposomes could be quantitatively evaluated by using  $I(r)$  and the linear relationship between  $I_0$  and  $I_b$ .

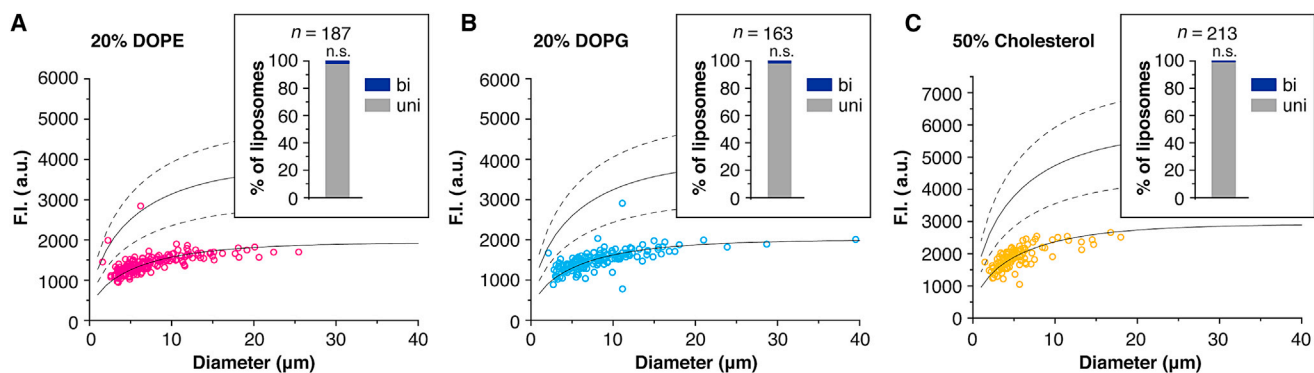

FIGURE 5 Effect of lipid composition on lamellarity. Lamellarity distributions of liposomes prepared with (A) egg PC and 20% (mol/mol) DOPE, (B) egg PC and 20% (mol/mol) DOPG, and (C) egg PC and 50% (mol/mol) cholesterol. In all experiments, the total lipid concentration in oil was fixed at 1 mM and 0.1% (mol/mol) rhodamine PE was added. We performed several independent experiments, and the data from all experiments are shown in the inset bar graphs. The percentages of unilamellar liposomes obtained from preparation using the different lipid compositions were compared to that obtained with 1 mM egg PC by the  $\chi^2$  test and Fisher's exact test. In all conditions, the percentages did not differ significantly (n.s.:  $p > 0.05$ ). We also confirmed that lamellarity of liposomes prepared with egg PC containing 5% or 10% DOPE, 5% or 10% DOPG, and 10% cholesterol did not differ significantly (Fig. S6).

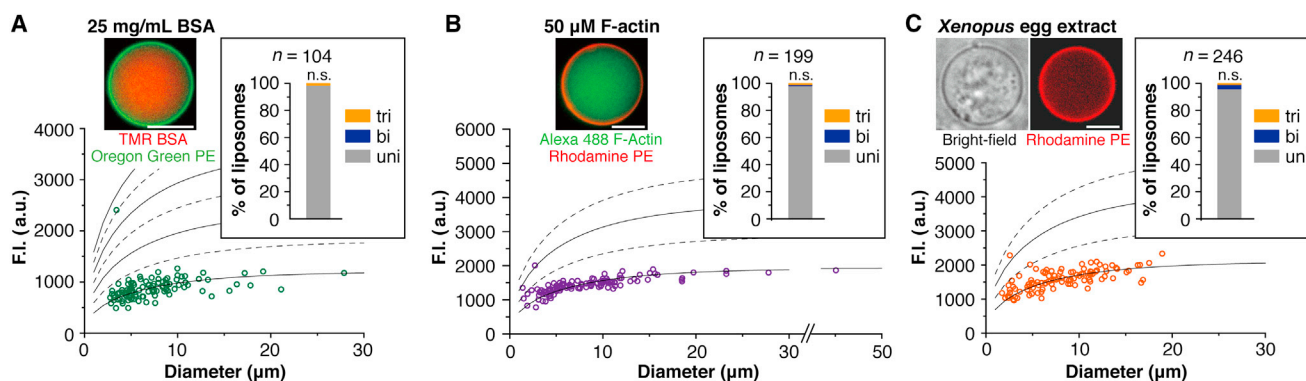

**FIGURE 6** Effect of encapsulation of highly concentrated proteins. Lamellarity distributions and cross-sectional images of liposomes containing (A) 25 mg/mL TMR-labeled BSA, (B) 50  $\mu$ M Alexa Fluor 488-labeled F-actin, or (C) *Xenopus* egg extracts. For the lipids, 1 mM egg PC containing 0.1% (mol/mol) Oregon Green PE (for BSA), 1 mM egg PC containing 0.1% (mol/mol) rhodamine PE (for F-actin), or 5 mM egg PC containing 50% (mol/mol) cholesterol and 0.1% (mol/mol) rhodamine PE (for *Xenopus* egg extract) dissolved in oil were used. We performed several independent experiments and all the data are shown in the inset bar graphs. The percentages of unilamellar liposomes prepared under each condition were compared to those prepared with 1 mM egg PC containing no vesicle contents by the  $\chi^2$  test and Fisher's exact test. In all conditions, the percentages of unilamellar liposomes did not differ significantly (n.s.:  $p > 0.05$ ). Scale bars: 5  $\mu$ m.

without performing the cluster analysis. Recently, a new method to measure lamellarity by using differential interference contrast microscopy was proposed (54). Although this method is not straightforward, it does not require cluster analysis. Therefore, this method might be a good alternative, depending on the situation.

## CONCLUSIONS

We established a method to measure the lamellarity of individual liposomes under an epifluorescence microscope. By using this method, we quantitatively verified that the inverted emulsion method efficiently generated giant unilamellar liposomes. Remarkably, lamellarity was highly robust against the lipid concentration dissolved in oil, lipid composition, and vesicle contents, including highly concentrated proteins and cell extracts. On average, 97.2% of liposomes were unilamellar under all the conditions we examined. All of these features are indispensable for liposome applications, especially designing cell models.

Recent technological developments in microfluidics have allowed us to assemble uniformly sized droplets (55) that can be transformed into uniformly sized liposomes through the oil/water interface formed inside a microfluidic device (56). By integrating on-chip sorting systems with our image-based lamellarity evaluation method, it will be possible to automatically collect uniformly sized unilamellar giant liposomes. Combination of the inverted emulsion method with fully automated sophisticated microfluidics might offer a powerful technique for mass production of desired cell model systems.

## SUPPORTING MATERIAL

Eight figures, one table, and one movie are available at [http://www.biophysj.org/biophysj/supplemental/S0006-3495\(14\)00608-0](http://www.biophysj.org/biophysj/supplemental/S0006-3495(14)00608-0).

The authors thank K. Kinoshita Jr. for helpful discussions, H. Eguchi, H. Kubota, K. Sato, and S. Ishii for actin preparation, and J. Takagi, K. Suzuki, and M. Tanabe for preparation of *Xenopus* egg extracts.

This work was supported in part by Grants-in-Aid for Young Scientists (B) and Scientific Research on Innovative Areas (M.M.) and Grants-in-Aid for Specially Promoted Research and Scientific Research (S) (S.I.) from the Ministry of Education, Culture, Sports, Science, and Technology of Japan.

## REFERENCES

- Alberts, B., A. Johnson, ..., P. Walter. 2008. *Molecular Biology of the Cell*, 5th ed. Garland Science, New York.
- Liu, A. P., and D. A. Fletcher. 2009. Biology under construction: in vitro reconstitution of cellular function. *Nat. Rev. Mol. Cell Biol.* 10:644–650.
- Hotani, H., and H. Miyamoto. 1990. Dynamic features of microtubules as visualized by dark-field microscopy. *Adv. Biophys.* 26:135–156.
- Fygenot, D. K., J. F. Marko, and A. Libchaber. 1997. Mechanics of microtubule-based membrane extension. *Phys. Rev. Lett.* 79:4497–4500.
- Miyata, H., and H. Hotani. 1992. Morphological changes in liposomes caused by polymerization of encapsulated actin and spontaneous formation of actin bundles. *Proc. Natl. Acad. Sci. USA.* 89:11547–11551.
- Miyata, H., S. Nishiyama, ..., K. Kinoshita, Jr. 1999. Protrusive growth from giant liposomes driven by actin polymerization. *Proc. Natl. Acad. Sci. USA.* 96:2048–2053.
- Honda, M., K. Takiguchi, ..., H. Hotani. 1999. Morphogenesis of liposomes encapsulating actin depends on the type of actin-crosslinking. *J. Mol. Biol.* 287:293–300.
- Limozin, L., and E. Sackmann. 2002. Polymorphism of cross-linked actin networks in giant vesicles. *Phys. Rev. Lett.* 89:168103.
- Limozin, L., M. Bärmann, and E. Sackmann. 2003. On the organization of self-assembled actin networks in giant vesicles. *Eur. Phys. J. E.* 10:319–330.
- Liu, A. P., D. L. Richmond, ..., D. A. Fletcher. 2008. Membrane-induced bundling of actin filaments. *Nat. Phys.* 4:789–793.
- Stachowiak, J. C., E. M. Schmid, ..., C. C. Hayden. 2012. Membrane bending by protein-protein crowding. *Nat. Cell Biol.* 14:944–949.
- Carvalho, K., F.-C. Tsai, ..., C. Sykes. 2013. Cell-sized liposomes reveal how actomyosin cortical tension drives shape change. *Proc. Natl. Acad. Sci. USA.* 110:16456–16461.



13. Tanaka-Takiguchi, Y., M. Kinoshita, and K. Takiguchi. 2009. Septin-mediated uniform bracing of phospholipid membranes. *Curr. Biol.* 19:140–145.
14. Terasawa, H., K. Nishimura, ..., T. Yomo. 2012. Coupling of the fusion and budding of giant phospholipid vesicles containing macromolecules. *Proc. Natl. Acad. Sci. USA.* 109:5942–5947.
15. Noireaux, V., and A. Libchaber. 2004. A vesicle bioreactor as a step toward an artificial cell assembly. *Proc. Natl. Acad. Sci. USA.* 101:17669–17674.
16. Pontani, L.-L., J. van der Gucht, ..., C. Sykes. 2009. Reconstitution of an actin cortex inside a liposome. *Biophys. J.* 96:192–198.
17. Murrell, M., L.-L. Pontani, ..., C. Sykes. 2011. Spreading dynamics of biomimetic actin cortices. *Biophys. J.* 100:1400–1409.
18. Murrell, M. P., R. Votriez, ..., M. L. Gardel. 2014. Liposome adhesion generates traction stress. *Nat. Phys.* 10:163–169.
19. Takiguchi, K., A. Yamada, ..., K. Yoshikawa. 2008. Entrapping desired amounts of actin filaments and molecular motor proteins in giant liposomes. *Langmuir.* 24:11323–11326.
20. Takiguchi, K., M. Negishi, ..., K. Yoshikawa. 2011. Transformation of actinHMM assembly confined in cell-sized liposome. *Langmuir.* 27:11528–11535.
21. Pinot, M., F. Chesnel, ..., Z. Gueroui. 2009. Effects of confinement on the self-organization of microtubules and motors. *Curr. Biol.* 19:954–960.
22. Maeda, Y. T., T. Nakadai, ..., A. Libchaber. 2012. Assembly of MreB filaments on liposome membranes: a synthetic biology approach. *ACS Synth. Biol.* 1:53–59.
23. Osawa, M., and H. P. Erickson. 2013. Liposome division by a simple bacterial division machinery. *Proc. Natl. Acad. Sci. USA.* 110:11000–11004.
24. van Swaay, D., and A. deMello. 2013. Microfluidic methods for forming liposomes. *Lab Chip.* 13:752–767.
25. Akashi, K., H. Miyata, ..., K. Kinoshita, Jr. 1996. Preparation of giant liposomes in physiological conditions and their characterization under an optical microscope. *Biophys. J.* 71:3242–3250.
26. Yamashita, Y., M. Oka, ..., M. Yamazaki. 2002. A new method for the preparation of giant liposomes in high salt concentrations and growth of protein microcrystals in them. *Biochim. Biophys. Acta.* 1561:129–134.
27. Montes, L. R., A. Alonso, ..., L. A. Bagatolli. 2007. Giant unilamellar vesicles electroformed from native membranes and organic lipid mixtures under physiological conditions. *Biophys. J.* 93:3548–3554.
28. Pott, T., H. Bouvrais, and P. Méléard. 2008. Giant unilamellar vesicle formation under physiologically relevant conditions. *Chem. Phys. Lipids.* 154:115–119.
29. Tsai, F.-C., B. Stuhmann, and G. H. Koenderink. 2011. Encapsulation of active cytoskeletal protein networks in cell-sized liposomes. *Langmuir.* 27:10061–10071.
30. Weinberger, A., F.-C. Tsai, ..., C. Marques. 2013. Gel-assisted formation of giant unilamellar vesicles. *Biophys. J.* 105:154–164.
31. Funakoshi, K., H. Suzuki, and S. Takeuchi. 2007. Formation of giant lipid vesicle like compartments from a planar lipid membrane by a pulsed jet flow. *J. Am. Chem. Soc.* 129:12608–12609.
32. Stachowiak, J. C., D. L. Richmond, ..., D. A. Fletcher. 2008. Unilamellar vesicle formation and encapsulation by microfluidic jetting. *Proc. Natl. Acad. Sci. USA.* 105:4697–4702.
33. Stachowiak, J. C., D. L. Richmond, ..., D. A. Fletcher. 2009. Inkjet formation of unilamellar lipid vesicles for cell-like encapsulation. *Lab Chip.* 9:2003–2009.
34. Richmond, D. L., E. M. Schmid, ..., D. A. Fletcher. 2011. Forming giant vesicles with controlled membrane composition, asymmetry, and contents. *Proc. Natl. Acad. Sci. USA.* 108:9431–9436.
35. Ota, S., S. Yoshizawa, and S. Takeuchi. 2009. Microfluidic formation of monodisperse, cell-sized, and unilamellar vesicles. *Angew. Chem. Int. Ed. Engl.* 48:6533–6537.
36. Pautot, S., B. J. Frisken, and D. A. Weitz. 2003. Production of unilamellar vesicles using an inverted emulsion. *Langmuir.* 19:2870–2879.
37. Yanagisawa, M., M. Iwamoto, ..., S. Oiki. 2011. Oriented reconstitution of a membrane protein in a giant unilamellar vesicle: experimental verification with the potassium channel KcsA. *J. Am. Chem. Soc.* 133:11774–11779.
38. Pautot, S., B. J. Frisken, and D. A. Weitz. 2003. Engineering asymmetric vesicles. *Proc. Natl. Acad. Sci. USA.* 100:10718–10721.
39. Hamada, T., Y. Miura, ..., M. Takagi. 2008. Construction of asymmetric cell-sized lipid vesicles from lipid-coated water-in-oil microdroplets. *J. Phys. Chem. B.* 112:14678–14681.
40. Hu, P. C., S. Li, and N. Malmstadt. 2011. Microfluidic fabrication of asymmetric giant lipid vesicles. *ACS Appl. Mater. Interfaces.* 3:1434–1440.
41. Suzuki, N., H. Miyata, ..., K. Kinoshita, Jr. 1996. Preparation of bead-tailed actin filaments: estimation of the torque produced by the sliding force in an in vitro motility assay. *Biophys. J.* 70:401–408.
42. Desai, A., A. Murray, ..., C. E. Walczak. 1999. The use of *Xenopus* egg extracts to study mitotic spindle assembly and function in vitro. *Methods Cell Biol.* 61:385–412.
43. van Meer, G., D. R. Voelker, and G. W. Feigenson. 2008. Membrane lipids: where they are and how they behave. *Nat. Rev. Mol. Cell Biol.* 9:112–124.
44. Song, L., M. R. Hobaugh, ..., J. E. Gouaux. 1996. Structure of staphylococcal  $\alpha$ -hemolysin, a heptameric transmembrane pore. *Science.* 274:1859–1866.
45. Robertson, J. D. 1981. Membrane structure. *J. Cell Biol.* 91:189s–204s.
46. Asakura, S., and F. Oosawa. 1954. On interaction between two bodies immersed in a solution of macromolecules. *J. Chem. Phys.* 22:1255–1256.
47. Emoto, K., T. Kobayashi, ..., M. Umeda. 1996. Redistribution of phosphatidylethanolamine at the cleavage furrow of dividing cells during cytokinesis. *Proc. Natl. Acad. Sci. USA.* 93:12867–12872.
48. Macdonald, P. M., and J. Seelig. 1987. Calcium binding to mixed phosphatidylglycerol-phosphatidylcholine bilayers as studied by deuterium nuclear magnetic resonance. *Biochemistry.* 26:1231–1240.
49. Ohvo-Rekilä, H., B. Ramstedt, ..., J. P. Slotte. 2002. Cholesterol interactions with phospholipids in membranes. *Prog. Lipid Res.* 41:66–97.
50. Campillo, C., P. Sens, ..., C. Sykes. 2013. Unexpected membrane dynamics unveiled by membrane nanotube extrusion. *Biophys. J.* 104:1248–1256.
51. Hase, M., A. Yamada, ..., K. Yoshikawa. 2006. Transport of a cell-sized phospholipid micro-container across water/oil interface. *Chem. Phys. Lett.* 426:441–444.
52. Yamada, A., T. Yamanaka, ..., D. Baigl. 2006. Spontaneous transfer of phospholipid-coated oil-in-oil and water-in-oil micro-droplets through an oil/water interface. *Langmuir.* 22:9824–9828.
53. Ito, H., T. Yamanaka, ..., K. Yoshikawa. 2013. Dynamical formation of lipid bilayer vesicles from lipid-coated droplets across a planar monolayer at an oil/water interface. *Soft Matter.* 9:9539–9547.
54. McPhee, C. I., G. Zorinians, ..., P. Borri. 2013. Measuring the lamellarity of giant lipid vesicles with differential interference contrast microscopy. *Biophys. J.* 105:1414–1420.
55. Jimenez, A. M., M. Roché, ..., Z. Gueroui. 2011. Towards high throughput production of artificial egg oocytes using microfluidics. *Lab Chip.* 11:429–434.
56. Matosevic, S., and B. M. Paegel. 2011. Stepwise synthesis of giant unilamellar vesicles on a microfluidic assembly line. *J. Am. Chem. Soc.* 133:2798–2800.

# Supporting Information

## Quantitative analysis of the lamellarity of giant liposomes prepared by the inverted emulsion method

Masataka Chiba,<sup>†△</sup> Makito Miyazaki,<sup>†△</sup> and Shin'ichi Ishiwata<sup>†‡\*</sup>

<sup>†</sup> Department of Physics, Faculty of Science and Engineering, Waseda University, 3-4-1 Okubo, Shinjuku-ku, Tokyo 169-8555, Japan

<sup>‡</sup> Waseda Bioscience Research Institute in Singapore (WABIOS), 11 Biopolis Way, #05-01/02 Helios, Singapore 138667, Singapore

<sup>△</sup> M.C. and M.M. contributed equally to this work

\* Corresponding author

Shin'ichi Ishiwata

Department of Physics, Faculty of Science and Engineering, Waseda University, 3-4-1 Okubo, Shinjuku-ku, Tokyo 169-8555, Japan

E-mail: ishiwata@waseda.jp

Tel & Fax: +81-3-5286-3437

## **Supporting Information Guide**

- 1. Supporting Figures and Legends S1 to S8**
- 2. Supporting Movie Legend S1**
- 3. Supporting Table Legend S1**

## 1. Supporting Figures and Legends S1 to S8

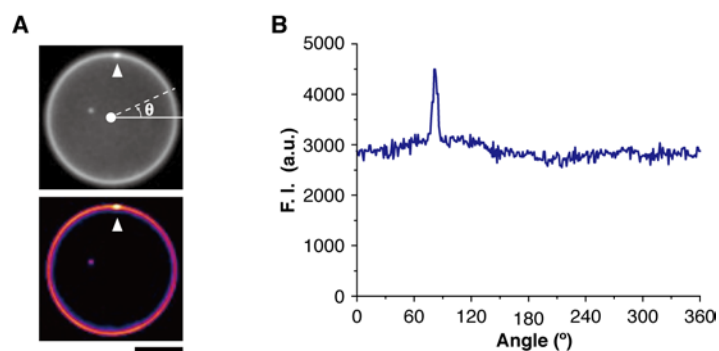

**Figure S1** Example of the liposome that had lipid aggregates on the membrane. (A) Epi-fluorescence image of the liposome at the equatorial plane (top), and the pseudo-color image (bottom). The liposome had a lipid aggregate on the membrane (white arrowheads). Scale bar: 5  $\mu\text{m}$ . (B) Fluorescence intensity profile along circumference of the membrane at the equatorial plane. The intensity profile had a sharp peak due to the lipid aggregate. Such liposomes were not used for the lamellarity analysis.

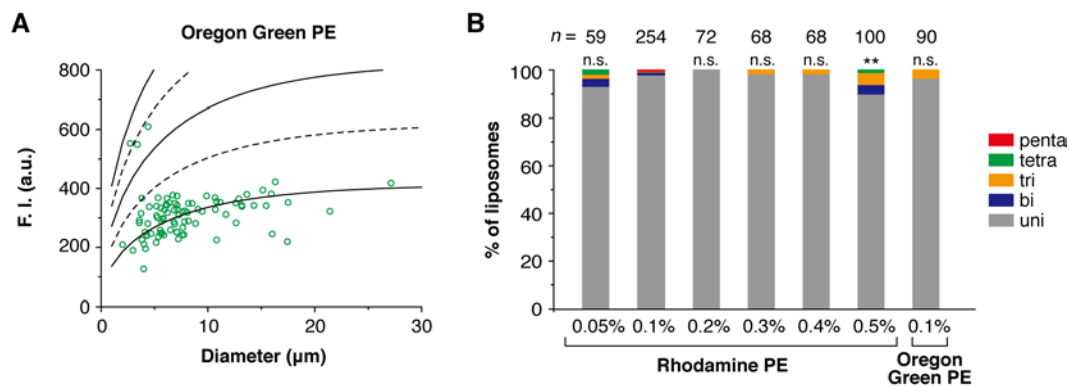

**Figure S2** Effect of fluorescently-labeled phospholipids on the lamellarity distribution. (A) Plots of the membrane fluorescence intensities of individual liposomes prepared by using 0.1% (mol/mol) Oregon Green PE instead of rhodamine PE. (B) Lamellarity distributions of the liposomes at various fluorescently-labeled lipid conditions. The proportions of unilamellar liposomes at each condition were compared with that of egg PC containing 0.1% (mol/mol) rhodamine PE by Z-test and Fisher's exact test. n.s.: not significant ( $p > 0.05$ ), \*\*:  $p < 0.01$ .

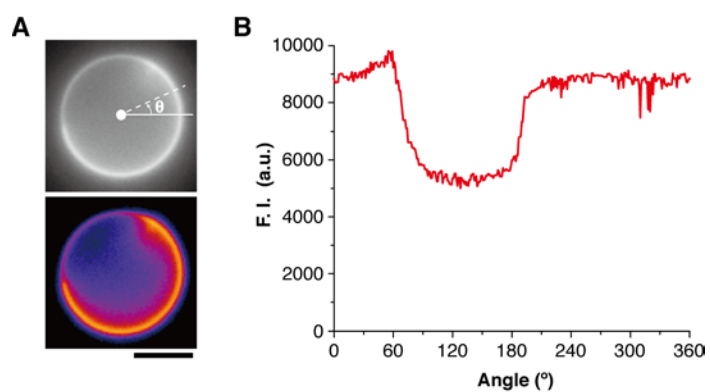

**Figure S3** Example of the partially multilamellar liposome. (A) Epi-fluorescence image of the partially bi-lamellar liposome at the equatorial plane (top), and the pseudo-color image (bottom). Scale bar: 5  $\mu\text{m}$ . (B) Fluorescence intensity profile along circumference of the membrane at the equatorial plane. The fluorescence intensity changed stepwise, indicating that the membrane was partially bi-lamellar. 5 mM Egg PC containing 0.1% (mol/mol) rhodamine PE was used for liposome preparation.

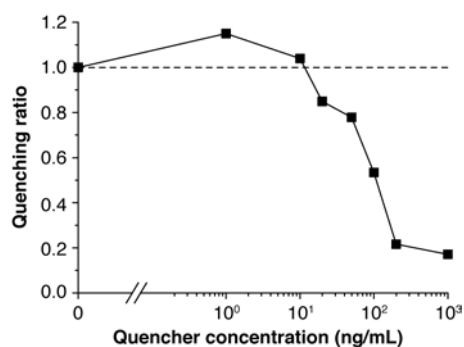

**Figure S4** Relationship between the quencher concentration and the membrane fluorescence intensity. The membrane fluorescence quenching ratios at various quencher concentrations were plotted. The quenching ratio was defined by the fluorescence intensity of the unilamellar membrane per unit surface area  $I_0$  in the presence of quencher divided by the original  $I_0$  (in the absence of quencher). For the quencher, QSY7 was used. The quenching ratio decreased monotonically and no plateau phases were observed around the quenching ratio = 0.5, indicating that the quencher QSY7 molecules quenched the fluorescence signal of rhodamine PE not only in the outer leaflet but also in the inner leaflet of the liposomal membrane.

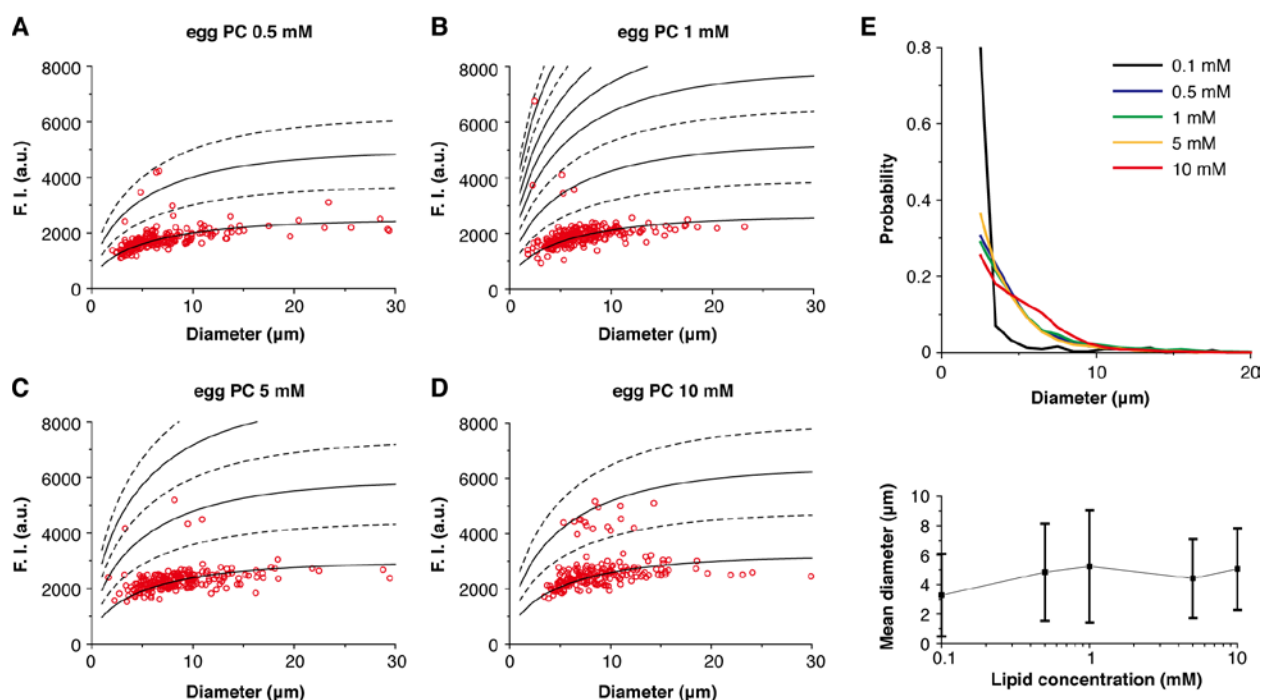

**Figure S5** Effects of lipid concentrations on the lamellarity and size of liposomes. (A–D) Membrane fluorescence intensities of individual liposomes at various concentrations of egg PC in mineral oil were plotted against the diameter of the liposomes. (E) Size distributions of the liposomes at various lipid concentrations (top), and the mean diameter (bottom). Error bars indicate the SD. The size distribution and the mean diameter of the liposomes prepared by 0.5 mM or higher than 0.5 mM egg PC showed no significant differences, suggesting that the vesicle size was almost independent of the lipid concentrations dissolved in oil.



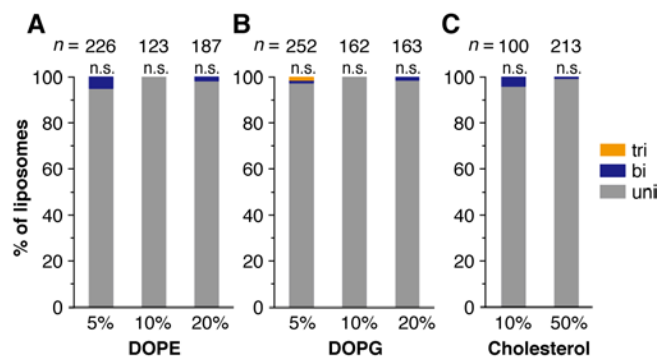

**Figure S6** Effects of lipid compositions on the lamellarity of liposomes. Lamellarity distributions of the liposomes (A) made of egg PC and 5%, 10%, or 20% (mol/mol) DOPE, (B) made of egg PC and 5%, 10%, or 20% (mol/mol) DOPG, and (C) made of egg PC and 10 or 50% (mol/mol) cholesterol. In all experiments, the total lipid concentration in oil was fixed at 1 mM and 0.1% (mol/mol) rhodamine PE was added. The proportions of unilamellar liposomes at each lipid composition were compared with 1 mM egg PC by Z-test and Fisher's exact test. In all conditions, the proportions showed no significant differences (n.s.:  $p > 0.05$ ).

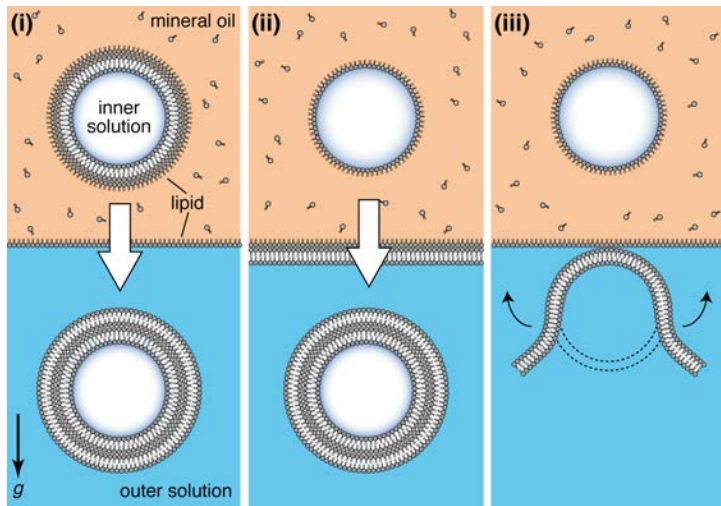

**Figure S7** Possible mechanisms of the formation of multilamellar liposomes. Although further experiments are needed to clarify the mechanism of the formation of multilamellar liposomes, the following three possibilities could be expected. (i) Lipid bilayer is occasionally assembled on the lipid monolayer inside the water-in-oil droplet. That is, the water droplet is surrounded by triple lipid layer (mono-layer plus bi-layer). This droplet is transformed into a bilamellar liposome by passing through the oil/outer buffer interface. (ii) Lipid bilayer is occasionally assembled just beneath the lipid monolayer at the oil/outer buffer interface. The droplet passing through this interface is transformed into a bilamellar liposome. (iii) The mechanism of (ii) may be attributable to the following one: Just after the water-in-oil droplet is transformed into a liposome, the liposome may be broken, and the lipid bilayer is spread out on the oil/outer buffer interface. This results in the formation of triple lipid layer at the interface, and thus the droplet passing through this interface is transformed into a bilayer liposome.

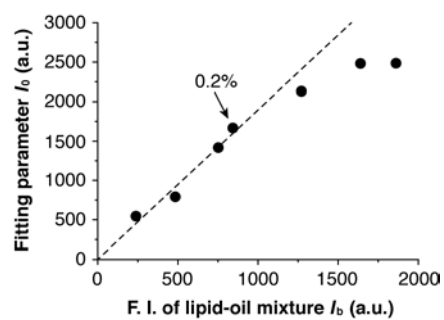

**Figure S8** Relationship between  $I_0$  and  $I_b$  The fluorescence intensity of the unilamellar membrane per unit surface area  $I_0$  showed linear correlation with the bulk fluorescence intensity of the lipid-oil mixture  $I_b$  at low rhodamine PE concentrations (up to ~0.2%). In all experiments, 1 mM egg PC was used and the additive amount of Rhodamine PE was varied.

## **2. Supporting Movie Legend S1**

### **Movie S1**

Time-lapse series of the actin-encapsulated liposome showing spontaneous formation of actin bundles inside the vesicle. The time interval between the frames is 5 min. Every frame shows the maximum projection image. High salt buffer containing  $\alpha$ -hemolysin was added to the external solution at 0 min. Actin: 10  $\mu$ M, Scale bar: 5  $\mu$ m.

## **3. Supporting Table Legend S1**

### **Table S1**

Lamellarity distributions of liposomes at various lipid concentrations, compositions, and vesicle inclusions are listed. In addition, the proportion of unilamellar liposomes at each condition is compared with that of 1 mM egg PC containing 0.1% (mol/mol) rhodamine PE by Z-test and Fisher's exact test, and the *p*-values obtained are listed.
